RESEARCH ARTICLE

# Strong Genetic Differentiation of Submerged Plant Populations across Mountain Ranges: Evidence from *Potamogeton pectinatus* in Iran

Shabnam Abbasi<sup>1</sup>, Saeed Afsharzadeh<sup>1\*</sup>, Hojjatollah Saeidi<sup>1</sup>, Ludwig Triest<sup>2</sup>

**1** Department of Biology, Faculty of Science, University of Isfahan, 81746-73441, Isfahan, Iran, **2** Laboratory of Plant Biology and Nature Management (APNA), Department of Biology, Vrije Universiteit Brussel (VUB), Pleinlaan 2, B-1050, Brussels, Belgium

\* [afshar144@yahoo.com](mailto:afshar144@yahoo.com); [s.afshar@sci.ui.ac.ir](mailto:s.afshar@sci.ui.ac.ir)

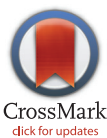

**OPEN ACCESS**

**Citation:** Abbasi S, Afsharzadeh S, Saeidi H, Triest L (2016) Strong Genetic Differentiation of Submerged Plant Populations across Mountain Ranges: Evidence from *Potamogeton pectinatus* in Iran. PLoS ONE 11 (8): e0161889. doi:10.1371/journal.pone.0161889

**Editor:** Tzen-Yuh Chiang, National Cheng Kung University, TAIWAN

**Received:** June 7, 2016

**Accepted:** August 12, 2016

**Published:** August 25, 2016

**Copyright:** © 2016 Abbasi et al. This is an open access article distributed under the terms of the [Creative Commons Attribution License](https://creativecommons.org/licenses/by/4.0/), which permits unrestricted use, distribution, and reproduction in any medium, provided the original author and source are credited.

**Data Availability Statement:** All relevant data are within the paper.

**Funding:** This work was supported by the Department of Biology, University of Isfahan as part of PhD thesis and the VUB (Vrije Universiteit Brussel) in Belgium's research group APNA laboratory for support in experimental work on microsatellites (BAS42). ShA was supported by a scholarship from Iran's Ministry of Science. The funders had no role in study design, data collection and analysis, decision to publish, or preparation of the manuscript.

## Abstract

Biogeographic barriers for freshwater biota can be effective at various spatial scales. At the largest spatial scale, freshwater organisms can become genetically isolated by their high mountain ranges, vast deserts, and inability to cross oceans. Isolation by distance of aquatic plants is expected to be stronger across than alongside mountain ridges whereas the heterogeneity of habitats among populations and temporary droughts may influence connectivity and hamper dispersal. Suitable aquatic plant habitats became reduced, even for the widespread submerged *Potamogeton pectinatus* L. (also named *Stuckenia pectinata*) giving structure to various aquatic habitats. We compared the level of genetic diversity in a heterogeneous series of aquatic habitats across Iran and tested their differentiation over distances and across mountain ranges (Alborz and Zagros) and desert zones (Kavir), with values obtained from temperate region populations. The diversity of aquatic ecosystems across and along large geographic barriers provided a unique ecological situation within Iran. *P. pectinatus* were considered from thirty-six sites across Iran at direct flight distances ranging from 20 to 1,200 km. Nine microsatellite loci revealed a very high number of alleles over all sites. A PCoA, NJT clustering and STRUCTURE analysis revealed a separate grouping of individuals of southeastern Iranian sites and was confirmed by their different nuclear ITS and cpDNA haplotypes thereby indicating an evolutionary significant unit (ESU). At the level of populations, a positive correlation between allelic differentiation  $D_{est}$  with geographic distance was found. Individual-based STRUCTURE analysis over 36 sites showed 7 genetic clusters.  $F_{ST}$  and  $R_{ST}$  values for ten populations reached 0.343 and 0.521, respectively thereby indicating that allele length differences are more important and contain evolutionary information. Overall, higher levels of diversity and a stronger differentiation was revealed among Iranian *P. pectinatus* than previously observed for temperate European regions, due to regional differences across mountain ranges over long distances.

**Competing Interests:** The authors have declared that no competing interests exist.

## Introduction

Biogeographic barriers for freshwater biota can be considered at three spatial scales, namely inter and within basin and continental. At the largest spatial scale, freshwater organisms are isolated by their high mountain ranges, inability to cross oceans and vast deserts [1]. Gene flow between populations of aquatic plants is restricted by the discontinuous nature of their habitat embedded in another terrestrial landscape and as such, lakes or rivers could be considered as islands of suitable habitats. Under an Island Migration Model, increasing geographical distance between populations is expected to lead to enhanced genetic isolation, which essentially corresponds to a stepping-stone population structure and requires that dispersal is primarily local rather than long-distance [2, 3, 4, 5, 6].

Besides merely distance as a limit to connectivity, especially large deserts and mountain ranges act as additional natural barriers. The flora of the mountains provides many examples of subspecies with populations and very closely related species that show restricted gene flow due to these inherent geographic barriers [7, 8]. Isolation by distance is stronger across than alongside mountain ridges [9, 10, 11].

Drought as a climatic event is one of the most threatening challenges that occur due to climatic change and global warming [12]. The heterogeneity of habitats and environment among populations probably influence gene flow in disrupting or dispersal, resulting in isolation by environment (IBE) model in which genetic differentiation is positively correlated with environmental differentiation [13, 14]. Drought has been a problematic phenomenon for aquatic ecosystems in Mediterranean temporary pools [15] and in low rainfall regions e.g. Central and SW Asia [16] during recent years because it declines water quality and decreases aquatic plant occurrences.

The importance of submerged vegetation in aquatic ecosystems management and biodiversity has been highlighted [17, 18, 19]. Many aquatic plants have mixed modes of reproduction and different models of dispersal [20, 21]. In submerged water plants (macrophytes), sexual reproduction by seeds produces new genotypes [21]. In spite of the low clonal diversity between and within populations [20], several studies showed that aquatic plant populations often had high clonal diversity [22, 23, 24, 25] nearly similar to non-clonal plant species [26]. Among aquatic plant taxa, fennel pondweed, *Potamogeton pectinatus* L. is one of most diverse submerged aquatic species [27, 28]. This species maintains many useful physiological traits such as tolerance to a wide range of nutrients, ability to grow in oligotrophic to eutrophic waters [29], and utility to progress quality of water by removing nutrients [30]. These useful traits made the species also a potentially important biotic tool for cleaning up polluted waters by heavy metals absorption [31, 32]. Plant parts are an important source of food for many waterfowl [23].

*P. pectinatus* reproduces both sexually and vegetatively through tubers emerging from the rhizomes and acting as propagules. Asexual reproduction is thought to be responsible for short distance dispersal while sexual reproduction with seeds is more important to ensure long distance dispersal and long-term survival [21, 29]. There are several studies about genetic variation of *P. pectinatus*. Hettiarachchi & Triest [33] used isozyme markers to detect genotypes within different habitats such as freshwater and brackish water, and showed a geographic trend in genotypes among freshwater populations. Using isozyme polymorphism, Hollingsworth *et al.* [2] confirmed the importance of local clonal growth in *P. pectinatus*. Hangelbroek *et al.* [23] used RAPD markers and showed that sexual reproduction has a very important role within a lake population. Hollingsworth *et al.* [2] also showed that isolation by distance was determined as a regulatory factor for gene flow at distances of more than 1000 km along the Atlantic and Baltic Sea coastal habitats, proposing that dispersal between populations is mainly

by seeds. The effect of migrating waterfowls on plant distribution pattern and seed dispersal over large distances have been reported [22, 34, 35]. Also Mader *et al.* [22] and King *et al.* [34] who used RAPD and ISSR markers, respectively concluded that genetic distance between populations of *P. pectinatus* increased with geographic distance. Following the development of nine polymorphic microsatellite loci for *P. pectinatus* [36] an evolutionary divergence and less gene flow between two types of habitat on a regional scale [37] were shown, namely for the brackish water populations of the Baltic Sea lagoons versus freshwater inland populations of Central Europe. Genetic differentiation of *P. pectinatus* but also other submerged plant taxa was found between coastal brackish water and freshwater inland habitats in lowland regions of W. Europe by Triest *et al.* [38]. They also detected that upstream forest ponds can be detected as source populations and deflections for clonal diversity to recolonize the stressful downstream river habitat. A more detailed study of the clonal diversity and fine-scaled spatial structure at individual level of *P. pectinatus* in river populations and managed pond [39] revealed that the ponds populations had a higher amount of gene and clonal diversity than those of rivers. Han *et al.* [40] using AFLP showed that *P. pectinatus* maintained a high level of variation within and between two contrasting and distant lakes in China. Those previous studies over the last decades confirmed that *P. pectinatus* has a mixed reproduction system, an overall high level of gene diversity and an increased differentiation over long distances of hundreds of kilometers. All previous studies were done in temperate and temperate-cold areas having many permanent water bodies and often at close vicinity. Therefore, it can be hypothesized that *P. pectinatus* populations might exhibit a stronger genetic differentiation over similar distances across mountain ranges and in a drier climate zone with often temporary habitats of very isolated wetlands areas and rivers habitats that show strong fluctuations due to high evaporation levels and use for irrigation in agriculture.

The specific biogeographic location of Iran [41] with its several large mountain ranges and deserts present a totally different suite of habitat types at a presumed low connectivity. The Alborz mountain ridge is located in the north whereas the Zagros mountain region is extending from northwest to southeast of Iran. The mountains of Kerman are located at the eastern edge of Zagros. Dashte Kavir is a desert region in the center of Iran. These geographic characteristics are assumed to create a differentiation and isolation between north and south populations and thus can pose an additional barrier to dispersal besides the distance to overcome. Along the same side of mountain ranges, these biogeographic barriers promote homogenization of aquatic biota [42]. Additionally, the mountains of Kerman located in the southeast of Iran are a potential barrier between north and south populations. Historically, these barriers identified as dominant factor in determining the composition of regional organisms [43, 44]. The world's second largest saline lake, Urmieh lake, is located in the north west region. Iran has a great diversity of aquatic ecosystems many of which have been recorded in the Ramsar Convention [45]. The largest portion of freshwater bodies in Iran is composed of many large rivers and lagoons. Different challenges such as the effects of human-based threats disrupt their ecological characteristics [46].

Our aim was to test, by considering sites with *P. pectinatus* populations over a long gradient of regions across mountain ranges as potential barriers, whether in such habitats

1. *P. pectinatus* can maintain its usually high levels of allele and gene diversity.
2. Differentiation over distances and across mountain ranges and around deserts would be more pronounced and structured than in temperate regions.

Therefore we considered a sampling design with a large number of sites across the various biogeographic regions and used the same microsatellite loci as a previous European studies,

following a preliminary taxon verification with nuclear ITS and maternal chloroplast marker genes.

## Materials and Methods

### The species

Fennel pondweed, *P. pectinatus* L. (= *Stuckenia pectinata*, see Lindqvist *et al.* [47] for taxonomic revision) is a submerged aquatic plant with a nearly cosmopolitan distribution ranging from sub-arctic to tropic regions, of different types of waterbodies and adapted to a large variation in water depth, flow regime, trophic status and salinity [48,37]. *Potamogeton pectinatus* reproduces both sexually and vegetatively through propagules emerging from the rhizomes [29]. It is an important source of food for many waterfowls [23]. This species harbors many useful physiological traits such as tolerance to a wide range of nutrients, capability to grow in oligotrophic to eutrophic waters [29], and ability to improve quality of water by removing nutrients [30]. These useful traits made the species a potentially important candidate for cleaning up polluted waters by heavy metals absorption [31, 32].

### Study area and sampling design

*P. pectinatus* plants were collected in 2015–2016 in thirty six sites from wetlands, lakes and rivers in Iran (Table 1, Fig 1). No specific permission was required for these locations/activities and field studies did not involve endangered or protected species. The geographic distance between pairs of populations ranged from 20 to 1200 km. Because the populations of this species are still declining due to human activities and recent drought in Iran; in each site we collected 1–20 individual shoots (ramets) at 2–3 m intervals. Design was to cover the entire distribution range and diversity of aquatic habitats within Iran. Our samples usually were in the main channel in downstream parts of rivers with low speed.

Samples were dried on silica gel prior to extraction and a voucher specimen for each population was deposited at HUI (Herbarium of the University of Isfahan). One subset (one individual from one sampling site) of the collection was used for cpDNA haplotypes and ITS (accession number: DQ840279.1) characterization (results not shown in this paper). Identification of *P. pectinatus* populations was based on cpDNA sequence variability in trnH-psbA referring to *P. pectinatus* haplotypes and on two nuclear spacers (ITS1 and ITS2)—as in Triest and Sierens [49]. A more detailed study of genetic diversity and structure at the population level was done on a subset of 10 populations where a sufficient large number of different genets could be considered.

For each specimen we measured 29 morphological characters. Among these, the leaf apex and leaf width (36 measurements per site) could differentiate morphologically the specimens characterized for a nuclear ITS-A or B. Mean rank for Kruskal-Wallis was between 1.12–3.11 mm for the group of specimens sharing ITS-B. Morphological measurements were tested for significant differences with one-way ANOVA (Kruskal-Wallis) and pairwise Mann-Whitney U test.

### DNA extraction and microsatellite amplification

Genomic DNA was extracted from leaf tissue using CTAB by Gawel and Jarret [50] with some modifications. All individuals were genotyped at nine nuclear microsatellite loci:

Potpect24, Potpect26, Potpect28, Potpect32, Potpect34, Potpect37, Potpect39, Potpect40, and Potpect42 [36]. Amplification of these nine loci was not performed in three multiplex PCR as described in Nies & Reusch [36], but into a unique multiplex PCR. This single amplification

**Table 1. Regions situation, location details and features of *P. pectinatus* populations in Iran, their nuclear ITS, trnH-psbA haplotype length, voucher number and type of water body and a diagnostic morphological feature.**

| Locality             | Region     | Long (E) | Lat (N) | Nuclear ITS | trnH-psbA Haplotype | Voucher | Water body | Mean Rank* |
|----------------------|------------|----------|---------|-------------|---------------------|---------|------------|------------|
| 1-Aligoodarz         | N. Zagros  | 49.165   | 33.478  | ITS-B       | 380                 | 20157   | River      | 1.75       |
| 2-Amirkelaieh        | N. Alborz  | 50.222   | 37.277  | ITS-A       | 379                 | 20147   | Wetland    | 0.25       |
| 3-Azbaran            | N. Alborz  | 52.476   | 36.650  | ITS-A       | 377                 | 20152   | Wetland    | 1.11       |
| 4-Barm               | N. Zagros  | 51.208   | 31.577  | ITS-A       | 378                 | 20174   | Spring     | 1.12       |
| 5-Boroujen           | N. Zagros  | 51.327   | 31.959  | ITS-B       | 380                 | 20168   | Stream     | 1.12       |
| 6-Chaghakhor         | N. Zagros  | 50.932   | 31.923  | ITS-A       | 377                 | 20169   | Wetland    | 1.03       |
| 7-Chamaseman         | N. Zagros  | 51.223   | 32.3727 | ITS-A       | 380                 | 20164   | Reservoir  | 0.58       |
| 8-Chamgordan         | N. Zagros  | 51.342   | 32.385  | ITS-A       | 379                 | 20160   | River      | 0.99       |
| 9-Chamtagh           | N. Zagros  | 50.993   | 32.459  | ITS-A       | 379                 | 20159   | River      | 0.47       |
| 10-Dahaneh sefidrood | N. Alborz  | 50.181   | 37.383  | ITS-A       | 378                 | 20146   | River      | 0.52       |
| 11-Delijan           | N. Zagros  | 50.682   | 33.990  | ITS-A       | 378                 | 20156   | Stream     | 1.19       |
| 12-Dizicheh          | N. Zagros  | 51.527   | 32.376  | ITS-A       | 379                 | 20162   | River      | 0.33       |
| 13-Gandoman          | N. Zagros  | 51.084   | 31.814  | ITS-A       | 377                 | 20172   | Wetland    | 0.5        |
| 14-Ghoorigol         | W. Alborz  | 46.705   | 37.915  | ITS-A       | 378                 | 20145   | Wetland    | 1.15       |
| 15-Googhar           | Kerman Ms  | 56.637   | 29.483  | ITS-B       | 380                 | 20179   | River      | 3.11       |
| 16-Hamzeali          | N. Zagros  | 51.076   | 31.835  | ITS-A       | 377                 | 20171   | Canal      | 1.14       |
| 17-Hasanabad         | SE. Zagros | 53.336   | 29.656  | ITS-A       | 378                 | 20178   | River      | 0.54       |
| 18-Hojatabad         | N. Zagros  | 50.842   | 32.510  | ITS-A       | 379                 | 20158   | River      | 1.12       |
| 19-Izeh              | SW. Zagros | 48.861   | 32.051  | ITS-A       | 379                 | 20167   | River      | 1.18       |
| 20-Jarghoieh         | N. Zagros  | 52.617   | 32.162  | ITS-A       | 379                 | 20165   | Wetland    | 0.55       |
| 21-Kaniborazan       | W. Alborz  | 45.783   | 36.966  | ITS-A       | 378                 | 20150   | Wetland    | 1.27       |
| 22-Komjan            | SE. Zagros | 53.148   | 29.669  | ITS-A       | 378                 | 20177   | River      | 0.85       |
| 23-Langrood          | N. Alborz  | 50.162   | 37.187  | ITS-A       | 378                 | 20148   | River      | 0.29       |
| 24-Miandoab          | W. Alborz  | 46.089   | 36.990  | ITS-A       | 378                 | 20149   | Wetland    | 1.11       |
| 25-Mianganran        | SW. Zagros | 49.870   | 31.882  | ITS-A       | 379                 | 20170   | Wetland    | 0.28       |
| 26-Shadegan          | SW. Zagros | 48.330   | 30.266  | ITS-A       | 378                 | 20175   | Wetland    | 1.23       |
| 27-Shushtar          | SW. Zagros | 48.859   | 32.051  | ITS-A       | 378                 | 20166   | River      | 0.75       |
| 28-Siahrood          | N. Alborz  | 52.885   | 36.303  | ITS-A       | 378                 | 20155   | River      | 0.9        |
| 29-Sivand            | SE. Zagros | 52.923   | 30.113  | ITS-A       | 378                 | 20176   | River      | 0.96       |
| 30-Soosangerd        | SW. Zagros | 47.916   | 31.795  | ITS-A       | 378                 | 20173   | River      | 1.2        |
| 31-Tonekabon         | N. Alborz  | 50.900   | 36.783  | ITS-A       | 378                 | 20151   | River      | 0.89       |
| 32-Valasht           | N. Alborz  | 51.541   | 36.454  | ITS-A       | 378                 | 20154   | Lake       | 0.89       |
| 33-Varnamkhast       | N. Zagros  | 51.367   | 32.377  | ITS-A       | 379                 | 20161   | River      | 1.22       |
| 34-Vimcheh           | N. Zagros  | 51.484   | 32.374  | ITS-A       | 379                 | 20163   | River      | 0.76       |
| 35-Yaschaman         | Kerman Ms  | 56.624   | 29.454  | ITS-B       | 380                 | 20180   | Stream     | 2.2        |
| 36-Zaghmarz          | N. Alborz  | 52.891   | 36.488  | ITS-A       | 378                 | 20153   | Wetland    | 1.03       |

\*: Mean Rank compute by Kruskal-Wallis

doi:10.1371/journal.pone.0161889.t001

was made possible by the use of the QIAGEN Multiplex PCR Kit (QIAGEN) in a final volume of 10.5  $\mu$ L, as follow: 25 ng of DNA template, 5  $\mu$ L 2 $\times$  QIAGEN Multiplex PCR Master Mix [QIAGEN Multiplex PCR Buffer, pH 8.7, containing dNTPs, QIAGEN HotStar Taq DNA Polymerase, and 6 mM MgCl<sub>2</sub> (for a final concentration of 3 mM)], 1  $\mu$ L Q-Solution (59 concentrated proprietary QIAGEN PCR additive), 1  $\mu$ L of a primer mix with 2  $\mu$ M of each primer (for a 0.2  $\mu$ M final concentration of each primer) and 1  $\mu$ L of highly pure water obtained from a Milli-Q Synthesis A10 (Millipore, Molsheim, France). PCR were carried out in 96-well plates

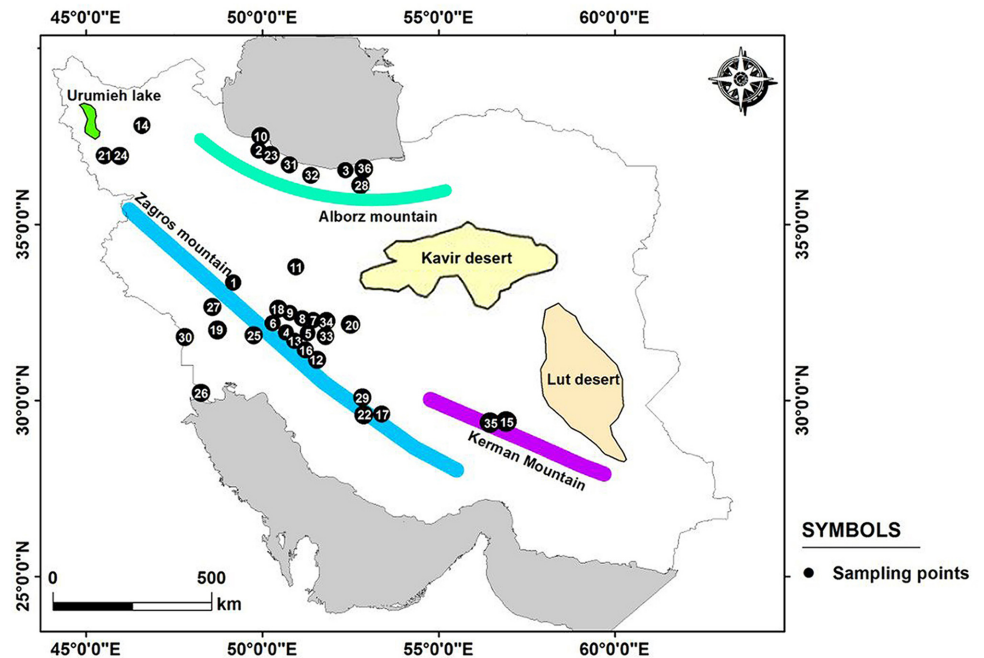

**Fig 1. Study area indicating 36 sites of *Potamogeton pectinatus* in Iran. Numbering as in Table 1.** 1: Aligoodarz; 2: Amirkelaieh; 3: Azbaran; 4: Barm; 5: Borujen; 6: Chaghakhor; 7: Chamaseman; 8: Chamgordan; 9: Chamtagh; 10: Dahaneh sefidrood; 11: Delijan; 12: Dizicheh; 13: Gandoman; 14: Ghoorigol; 15: Googhar; 16: Hamzeali; 17: Hasanabad; 18: Hojatabad; 19: Izeh; 20: Jarghoieh; 21: Kaniborazan; 22: Komjan; 23: Langrood; 24: Miandoab; 25: Miangaran; 26: Shadegan; 27: Shushtar; 28: Siahrood; 29: Sivand; 30: Soosangerd; 31: Tonekabon; 32: Valasht; 33: Varnamkhast; 34: Vimcheh; 35: Yaschaman; 36: Zaghmarz.

doi:10.1371/journal.pone.0161889.g001

on a MyCycler™ thermal cycler (BIO-RAD) under the following conditions: 15 min denaturing at 95°C, [3000 denaturing at 94°C, 1.5 min annealing at 57°C and 1 min extension at 72°C] × 30 cycles and a final extension step at 72°C for 10 min. PCR were carried out in 96-well plates on a MyCycler™ thermal cycler (BIO-RAD) under the following conditions: 4 min denaturing at 94°C, [3000 denaturing at 94°C, 1 min annealing at 57°C and 1 min extension at 72°C] × 30 cycles and a final extension step at 72°C for 30 min. PCR products were run on ABI3730XL sequencer (Macrogen, Seoul, Korea) and fragments were scored with GeneMarker V2.20 (SoftGenetics LLC, State College, USA). Although *P. pectinatus* is hexaploid, the identified primer pairs amplify microsatellite loci that are “diploids”, confirming the observations of Nies & Reusch [36, 37]. To explain this phenomenon, these authors support the idea that the time that has elapsed after the polyploidisation event was sufficient to cause genetic divergence of the microsatellites on the different sets of homologous chromosomes [37]. After excluding forty eight repeated multilocus genotypes (MLGs) from the data set, we calculated genetic diversity measures on 133 individuals using FSTAT 2.9.3 [51] and GenAlex 6.5 [52]. At locus level, we estimated the number of alleles (A), effective number of alleles (Ae), observed heterozygosity (Ho), expected and unbiased expected heterozygosity (He and uHe), Nei’s heterozygosity at subpopulation level (Hs) and total (Ht), Wright’s F statistics [53] with inbreeding coefficient ( $F_{IS}$ ), total inbreeding ( $F_{IT}$ ), subpopulation differentiation ( $F_{ST}$ ) and gene flow (Nm) using GenAlex. Weir & Cockerham [54] estimation of  $F_{IT}$  (CapF),  $F_{IS}$  (small f) and  $F_{ST}$  (Theta) following Rousset [55] were calculated with FSTAT. Inbreeding values for the total populations are given by small f and jackknifed over loci (FSTAT).

We tested for recent bottlenecks in each population under the two-phase model (TPM) with 95% single-step mutations and 5% multiple-step mutations (Wilcoxon's test 1-tailed) using bottleneck 1.2.02 [56]. Genetic structure was assessed with a three-level analysis of molecular variance (AMOVA) [57] using hierarchical and standardized fixation indices for 5 regions, 10 populations and 68 individuals (GenAlex). Pairwise  $F_{ST}$ -values were calculated between all pairs of populations and tested for significant differentiation using 999 permutations. Isolation-by-distance between pairs of populations and their geographical distances was tested with  $\Theta/1 - \Theta$  considering straight flight distances, log transformed [55] between populations in a Mantel test using 1000 randomizations [58]. An estimator of actual differentiation  $D_{est}$  [59] was calculated between all pairs of populations using SMOGD [60] and used in a Mantel test with log transformed straight flight distances. To infer the population structure on basis of assignment of individual genotypes into groups, a Bayesian clustering method [61] was carried out using STRUCTURE version 2.3. We tested for the number of clusters (K) in ten independent runs from 1 to 14 (10,000 burn-in, 10,000 Markov chain Monte Carlo replicates in each run), without using sampling site as a prior to assess convergence of the estimated ln probability of data, ln (PD). Runs were carried out assuming admixture and an independent model of allele frequencies. The number of clusters was determined from the K with the highest posterior probability and using the second-order rate of change of the likelihood function  $\Delta K$ , as suggested by Evanno *et al.* [62]. For testing the evidence of scoring error, Evidence of large allele dropout and Evidence of null allele we used Micro-checker 2.2 software. Also we used POPTREE2 [63] software for cluster analysis. Isolation by distance and  $R_{ST}$  was tested by calculating multilocus estimates of kinship coefficient (Fij) between all pairs of individuals implemented in the software SPAGeDi v1.4 [64].

## Results

The haplotypes obtained from amplified product lengths of TrnH-PsbA showed congruent differences for Aligoodarz (1), Borujen (5), Googhar (15) and Yaschaman (35) when compared to all other populations. Morphological measurements between this group (mean rank of 1.12–3.11 mm) and specimens from other sites (mean rank of 0.25–1.27 mm) were significant with one-way ANOVA (Kruskal-Wallis) ( $P = 0.036$ ) and pairwise Mann-Whitney U test ( $P = 0.012$ ). The lowest morphological value was 0.25 mm (2-Amirkelaieh) whereas the highest value 3.11 mm (15-Googhar).

## Microsatellite loci properties

As the primers were previously developed and used on European *Potamogeton pectinatus* populations, we tested these cross-amplified loci with microchecker, but there was no evidence for null alleles, large allele dropout or scoring error due to stuttering. Over all sites and loci, the nine microsatellite loci revealed a total of 130 alleles. The mean number of alleles was highest for potpec 39 (3.3) and lowest for potpec24 (1.9) with an overall observed heterozygosity ( $H_o = 0.2$ –0.7) nearly similar to the overall expected heterozygosity ( $H_e = 0.3$ –0.7) (Table 2).

Out of 181 ramets in 36 sites, 133 genets (MLG) were obtained with re-encounters only occurring within a same site (Table 3). Despite the small number of ramets available per site (2–15), the obtained number of genets remained between 2–11, thereby giving a range of values for clonal richness from 0–1 (Table 3). The mean number of alleles varied from 1.3–5.2, the effective number of alleles from 1.5–4.0. Considering these 36 sites, their number of private alleles ranged between 0–7, the observed heterozygosity between 0.2–0.7, unbiased expected heterozygosity from 0.111–0.815. For ten populations, allelic richness was between 1.5–3.6

**Table 2. Features of 9 microsatellite loci for *Potamogeton pectinatus* as observed in 36 sites of this study Total number of alleles (A), overall observed heterozygosity ( $H_o$ ) and overall expected unbiased heterozygosity ( $uH_E$ ), are given for 36 sites.**

| Locus      | Primer sequence                | Repeat motif  | Range   | A   | $H_o$ | $uH_E$ | Gen Bank accession no. |
|------------|--------------------------------|---------------|---------|-----|-------|--------|------------------------|
| Potpect 24 | F Ned- TCAGTGAAAGAAAGCCAGGA    | (GA) <i>n</i> | 132–186 | 1.9 | 0.210 | 0.314  | AY568087               |
|            | R GGGCTTATGGCGTTATCAA          |               |         |     |       |        |                        |
| Potpect 26 | F Fam-GTATAGGCGAGGTGCGAGAG     | (CT) <i>n</i> | 234–250 | 2.4 | 0.595 | 0.541  | AY568088               |
|            | R CTTTCATGTCGACCACCTTCC        |               |         |     |       |        |                        |
| Potpect 28 | F Fam-TCGTTTCTCCATTCGTAGG      | (GA) <i>n</i> | 164–187 | 2.5 | 0.684 | 0.560  | AY568089               |
|            | R AATAAAAAGGGCCCAGACC          |               |         |     |       |        |                        |
| Potpect 32 | F Hex-CAGCAAACGAAACAACCAAA     | (GA) <i>n</i> | 202–247 | 2.3 | 0.251 | 0.433  | AY568090               |
|            | R AAAAGAAGCCGTTGTTTACAGAG      |               |         |     |       |        |                        |
| Potpect 34 | F Fam-GTAAGCAAGCAGCGTCAAC      | (GA) <i>n</i> | 223–251 | 3.0 | 0.612 | 0.639  | AY568091               |
|            | R GTTTGTGAGCTAGCGGAAG          |               |         |     |       |        |                        |
| Potpect 37 | F Hex-CACTTCCTCTGTGCTGCTTG     | (CT) <i>n</i> | 137–177 | 2.6 | 0.609 | 0.614  | AY568092               |
|            | R GCGTGCTCTTCTGAGTTCT          |               |         |     |       |        |                        |
| Potpect 39 | F Hex-TCACAACCTCACCCAGAA       | (GA) <i>n</i> | 212–246 | 3.3 | 0.621 | 0.629  | AY568093               |
|            | R CCATTTCCATTCTCACTGC          |               |         |     |       |        |                        |
| Potpect 40 | F Ned-AAATCTCAAATATTTCCACTGTTG | (GA) <i>n</i> | 179–208 | 2.5 | 0.556 | 0.542  | AY568094               |
|            | R CAAAGATTGAGCTCCCCAAA         |               |         |     |       |        |                        |
| Potpect 42 | F Ned-TTAGCAAGTGGGTGGGTTTC     | (CT) <i>n</i> | 177–208 | 3.1 | 0.761 | 0.706  | AY568095               |
|            | R TGCACTCGTGTCTCTTCC           |               |         |     |       |        |                        |

doi:10.1371/journal.pone.0161889.t002

whereas the inbreeding coefficient  $F_{IS}$  was estimated -0.077–0.846. The populations of Azbaran (3), Vimcheh (34) and Izeh (19) showed evidence of recent bottleneck events (Table 3).

From the 10 considered populations, the percent of individuals assigned to the same population was higher (76%) than those assigned to other populations (24%). The populations of Amirkelaieh (2), Azbaran (3) and Kaniborazan (21) did not share any allele.

A Neighbor Joining tree of microsatellite gene diversity was congruent with the *P. pectinatus* identity of nuclear ITS and trnH-psbA (380 bp length) for the samples from Hamzeali (16) Borujen (5), Googhar (15), and Yaschaman (36) (Fig 2).

A PCoA at the level of all individuals revealed a gradient along a first axis that explained 28.9% of all variation but where several individuals were clearly separated as a group (Figs 3 and 4). Most of these individuals were also tested for ITS and showed the ITS-B sequence. A PCoA confined to ten populations that explained 28.8% of all variation revealed a very clear separation of most populations from each other. A gradient can be observed from individuals of N. Alborz, around lake Urumieh, S.E. Zagros, N. Zagros and SE Zagros to Kerman mountain ranges.

Percentage of variation explained by the first three axes in PCoA at 10 populations is 28.80% and 17.94% for first and second axes, respectively.

The range of  $F_{ST}$  was between 0.156–0.595 among the ten populations. The lowest  $F_{ST}$  was between Izeh (19) and Amirkelaieh (2) and the highest was between Azbaran (3) and Yaschaman (35) (Table 4).

The range of  $D_{est}$  values were between from 0.001 to 0.925. There was no relationship at all between  $F_{ST}$  and  $D_{est}$  (Pearson correlation = 0.007) indicating that allelic differentiation can be more important as an explanatory variable of IBD. There was a positive relationship between  $F_{ST}$  and geographic distance ( $R^2 = 0.35$  and  $P = 0.01$ ) but there was an improved positive correlation between  $D_{est}$  and  $\ln(1+Km)$  ( $P = 0.01$ ,  $R^2 = 0.56$ ) (Fig 5).



**Table 3. Clonal diversity (N, G, R) and gene diversity measures of *Potamogeton pectinatus* individuals at 36 sites with mean number of alleles (Na), effective number of alleles (Ae), number of private alleles (PA), observed heterozygosity (Ho), unbiased expected heterozygosity (uHe); and for 10 sites considered as populations the inbreeding coefficient (F<sub>IS</sub>) Bottleneck test and allelic richness (Ar).**

| Pop code             | No ramets (N) | No genets (G) | Clonal richness (R) | Na  | Ae  | PA   | Ho    | uHE   | F <sub>IS</sub> | Bottleneck (TPM) Wilcoxon | Ar  |
|----------------------|---------------|---------------|---------------------|-----|-----|------|-------|-------|-----------------|---------------------------|-----|
| 1-Aligoodarz         | 7             | 2             | 0.2                 | 1.8 | 1.7 | 1    | 0.333 | 0.463 | NA              | NA                        | NA  |
| 2-Amirkelaieh        | 10            | 8             | 0.7                 | 4.4 | 2.9 | 2    | 0.664 | 0.644 | 0.021           | 0.450                     | 3.2 |
| 3-Azbaran            | 10            | 4             | 0.3                 | 1.9 | 1.8 | 0    | 0.667 | 0.414 | 0.846*          | 0.004*                    | 1.9 |
| 4-Barm               | 3             | 3             | 1                   | 3.4 | 2.9 | 0    | 0.593 | 0.756 | NA              | NA                        | NA  |
| 5-Borujen            | 2             | 2             | 1                   | 1.3 | 1.3 | 0    | 0.111 | 0.111 | NA              | NA                        | NA  |
| 6-Chaghakhor         | 4             | 3             | 0.7                 | 1.9 | 1.7 | 1    | 0.296 | 0.385 | NA              | NA                        | NA  |
| 7-Chamaseman         | 3             | 3             | 1                   | 2.0 | 1.6 | 0    | 0.296 | 0.430 | NA              | NA                        | NA  |
| 8-Chamgordan         | 2             | 2             | 1                   | 1.7 | 1.7 | 2    | 0.667 | 0.519 | NA              | NA                        | NA  |
| 9-Chamtagh           | 2             | 2             | 1                   | 2.4 | 2.2 | 1    | 0.389 | 0.667 | NA              | NA                        | NA  |
| 10-Dahaneh sefidrood | 3             | 2             | 0.5                 | 2.2 | 2.0 | 0    | 0.556 | 0.537 | NA              | NA                        | NA  |
| 11-Delijan           | 4             | 4             | 1                   | 3.2 | 2.7 | 2    | 0.778 | 0.679 | NA              | NA                        | NA  |
| 12-Dizicheh          | 2             | 2             | 1                   | 3.0 | 2.8 | 0    | 0.611 | 0.815 | NA              | NA                        | NA  |
| 13-Gandoman          | 2             | 2             | 1                   | 2.6 | 2.3 | 1    | 0.500 | 0.630 | NA              | NA                        | NA  |
| 14-Ghoorigol         | 6             | 3             | 0.4                 | 1.8 | 1.7 | 1    | 0.704 | 0.452 | NA              | NA                        | NA  |
| 15-Ghooghar          | 3             | 3             | 1                   | 1.7 | 1.5 | 0    | 0.241 | 0.300 | NA              | NA                        | NA  |
| 16-Hamzeali          | 2             | 2             | 1                   | 1.1 | 1.1 | 0    | 0.111 | 0.111 | NA              | NA                        | NA  |
| 17-Hasanabad         | 2             | 1             | 0.0                 | 1.7 | 1.7 | 0    | 0.667 | 0.667 | NA              | NA                        | NA  |
| 18-Hojatabad         | 2             | 2             | 1                   | 1.7 | 1.6 | 0    | 0.500 | 0.407 | NA              | NA                        | NA  |
| 19-Izeh              | 14            | 6             | 0.4                 | 4.4 | 3.5 | 1    | 0.593 | 0.709 | -0.077          | 0.007*                    | 3.4 |
| 20-Jarghoieh         | 4             | 4             | 1                   | 3.2 | 2.6 | 1    | 0.472 | 0.567 | NA              | NA                        | NA  |
| 21-Kaniborazan       | 15            | 11            | 0.7                 | 3.9 | 2.9 | 7    | 0.763 | 0.619 | 0.177*          | 0.069                     | 2.8 |
| 22-Komjan            | 5             | 5             | 1                   | 2.7 | 2.5 | 1    | 0.717 | 0.574 | 0.217*          | 0.349                     | 2.5 |
| 23-Langrood          | 5             | 3             | 0.5                 | 2.7 | 2.5 | 0    | 0.630 | 0.556 | NA              | NA                        | NA  |
| 24-Miandoab          | 6             | 6             | 1                   | 4.2 | 3.1 | 5    | 0.494 | 0.618 | -0.269*         | 0.307                     | 2.6 |
| 25-Mianganran        | 3             | 2             | 0.5                 | 1.7 | 1.6 | 0    | 0.611 | 0.426 | NA              | NA                        | NA  |
| 26-Shadegan          | 3             | 2             | 0.5                 | 1.7 | 1.5 | 0    | 0.444 | 0.389 | NA              | NA                        | NA  |
| 27-Shushtar          | 11            | 8             | 0.7                 | 5.2 | 4.0 | 3    | 0.679 | 0.741 | 0.183*          | 0.477                     | 3.6 |
| 28-Siahrood          | 5             | 2             | 0.2                 | 2.9 | 2.7 | 0    | 0.778 | 0.778 | NA              | NA                        | NA  |
| 29-Sivand            | 5             | 3             | 0.5                 | 3.1 | 2.7 | 0    | 0.796 | 0.737 | NA              | NA                        | NA  |
| 30-Soosangerd        | 5             | 5             | 1                   | 3.3 | 2.8 | 2    | 0.683 | 0.639 | 0.296*          | 0.222                     | 2.9 |
| 31-Tonekabon         | 2             | 1             | 0.0                 | 1.8 | 1.8 | 0    | 0.778 | 0.778 | NA              | NA                        | NA  |
| 32-Valasht           | 7             | 4             | 0.5                 | 2.8 | 2.3 | 0    | 0.648 | 0.525 | NA              | NA                        | NA  |
| 33-Varnamkhast       | 4             | 3             | 0.7                 | 3.1 | 2.8 | 2    | 0.389 | 0.737 | NA              | NA                        | NA  |
| 34-Vimcheh           | 6             | 6             | 1                   | 3.8 | 2.1 | 2    | 0.433 | 0.521 | -0.299*         | 0.006*                    | 2.6 |
| 35-Yaschaman         | 9             | 9             | 1                   | 2.8 | 1.6 | 0    | 0.228 | 0.311 | 0.091           | 0.059                     | 1.5 |
| 36-Zaghmarz          | 3             | 3             | 1                   | 3.0 | 2.7 | 0    | 0.778 | 0.704 | NA              | NA                        | NA  |
| Mean/total           | 5             | 3.7           | 0.7                 | 2.6 | 2.2 | 0.97 | 0.54  | 0.55  |                 |                           |     |

\* indicates populations with significant F<sub>IS</sub> (p < 0.05).

doi:10.1371/journal.pone.0161889.t003

An AMOVA showed that the percentage of molecular variance among regions and populations were 15% and 18%, respectively (Table 5).

The genetic structure of 10 populations of *Potamogeton pectinatus* in Iran showed 6 genetic clusters (Fig 6). The samples from Yaschaman (35) are placed separately.

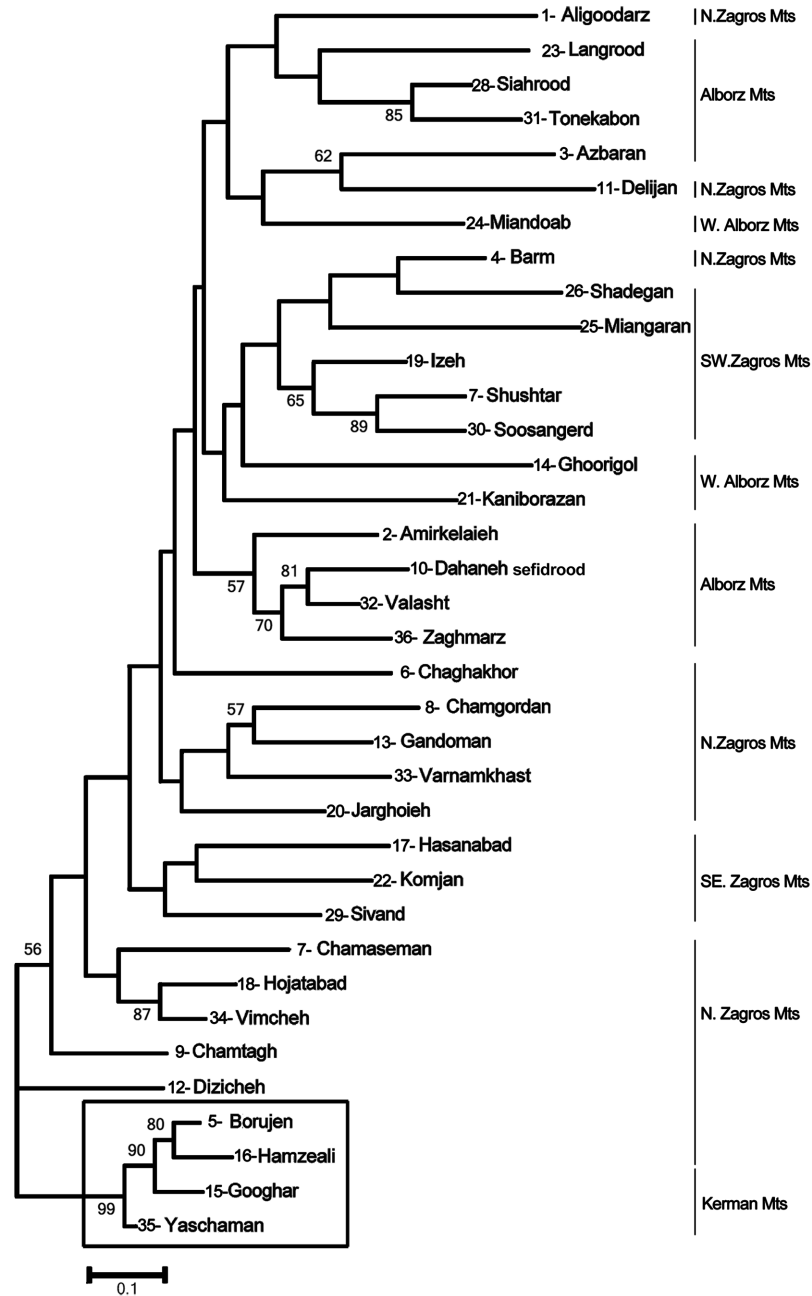

**Fig 2. Neighbor joining tree of microsatellite diversity in 36 sites of *P. pectinatus*.**

doi:10.1371/journal.pone.0161889.g002

Genetic analyses for 10 populations at 5 distance classes showed that  $F_{ST}$  and  $R_{ST}$  values were 0.343 and 0.485, respectively. [Table 6](#) indicated special genetic structure analysis for these classes.

The higher values for  $R_{ST}$  indicated that allele length differences are more important over the entire study area and evolutionary significant through low historical connectivity. In the second distance class,  $F_{ST}$  and  $R_{ST}$  had a similar value (0.32–0.33). In the largest distance class, the  $R_{ST}$  value (0.698) and  $F_{ST}$  value (0.496) were highest. Also in all distance classes, except second distance class, the values for  $R_{ST}$  were significantly higher than for  $F_{ST}$ .  $F_{ST}$  for all loci

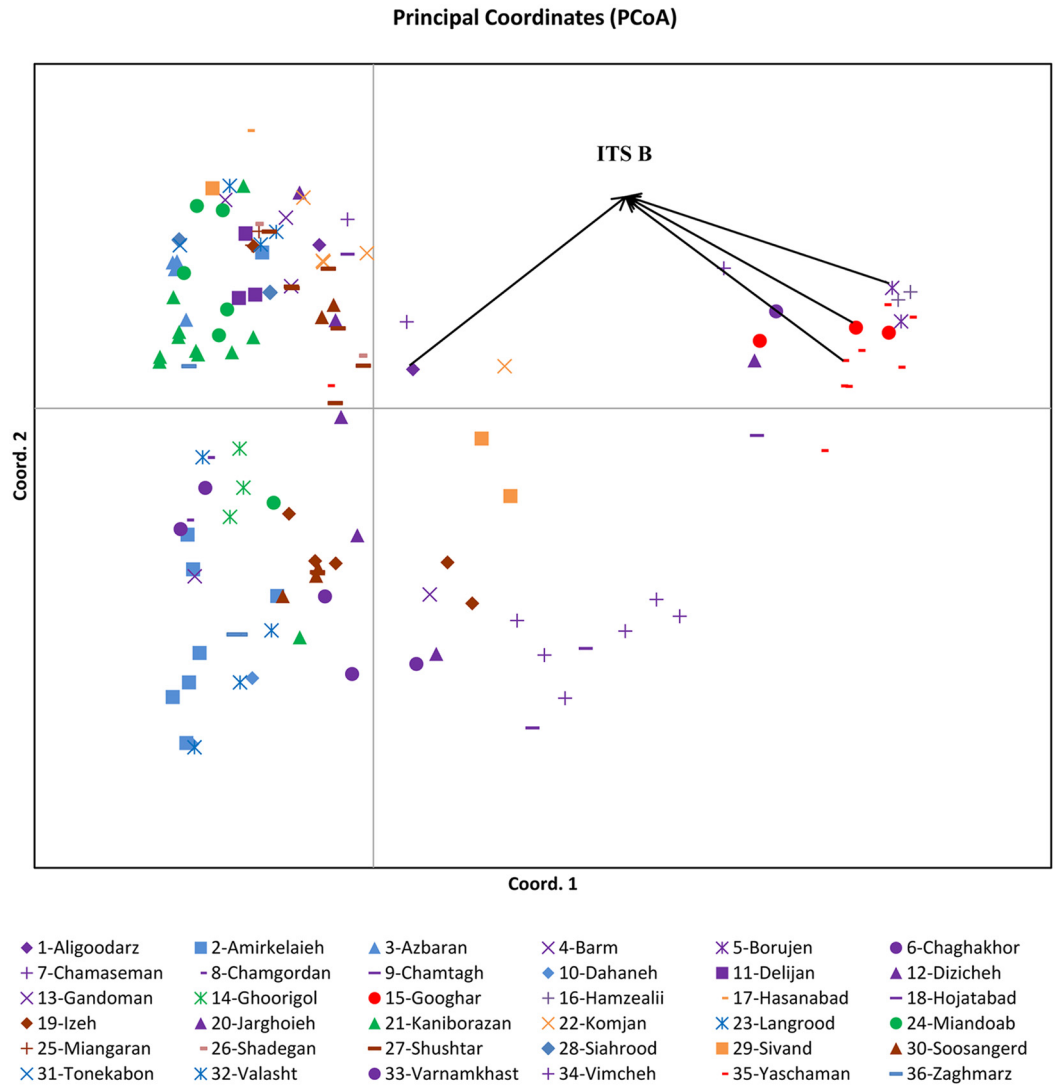

**Fig 3. PCoA grouping of 133 individuals from 36 sites.** The samples from Aligoodarz (1), Borujen (5), Googhar (15), and Yaschaman (36), Hamzealii (16) are grouped separately (ITS B). (symbols of sites situated along the same mountain range share a same color).

doi:10.1371/journal.pone.0161889.g003

P(1-sided test,  $H_1: obs > exp$ ) between neighboring populations of Izeh and Shushtar was not significant. Genetic analyses at the individual level in 5 distance classes showed that pairwise correlation coefficients of allele size are significant for upper distance classes (beyond 610 km).

## Discussion

### Allele and gene diversity

In spite of preliminary studies on the vegetative mode of reproduction of *P. pectinatus* and previous genetic studies on submerged aquatic plants based on dominant markers [29, 33, 2], as well as in other studies on co-dominant markers [36, 39] a high level of allelic and gene diversity was shown. Several studies showed that aquatic plant populations often had high clonal diversity [22, 23, 24, 25] nearly similar to non-clonal plant species [26]. Among aquatic plant taxa, fennel pondweed, *P. pectinatus* L. is one of most diverse submerged aquatic species [27,

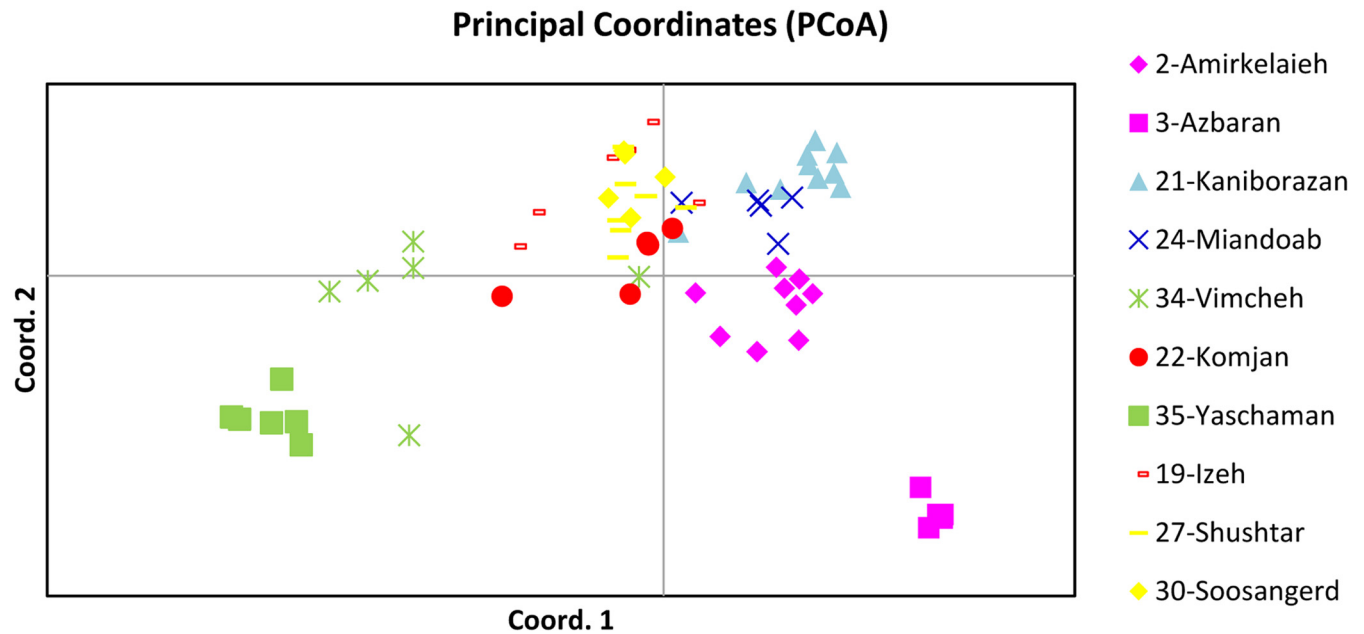

Fig 4. PCoA of 10 populations from each major region.

doi:10.1371/journal.pone.0161889.g004

[28]. Across the wide study area we observed 130 different alleles for 133 individuals whereas Triest *et al* [39] and Nies & Reusch [36] observed 56 and 65 alleles with microsatellites, respectively in a much larger amount of individuals. This can be explained from the geographic distances that reached only up to 250 km whereas our study covered sites at distance up to 1200 km, potentially leading to detection of much more allelic variants and a greater isolation by distance between populations. The lower number of samples per site clearly allowed to obtain many more alleles than in temperate regions and to detect relevant genetic structures in agreement with biogeography and mountain ranges, the sample size did not prevent us from observing the strong differentiation (with more samples/site, alleles would remain different across sites and regions). Other researchers also used the low sample size for example Rodriguez-Bonilla *et al* [65] in genetic diversity evaluation of sweet potato in Puerto Rico used 137 landraces, Population Genetics study of the Sao Tome Caecilian (Gymnophiona: Dermophiidae: *Schistometopum thomense*) revealed strong geographic structuring with 138 specimens by

Table 4. Pairwise Population significance  $F_{ST}$  (below diagonal) and  $D_{est}$  (above diagonal) values.

| Amirkelaieh  | Azbaran | Izeh  | Kaniborazan | Komjan | Miandoab | Shushtar | Soosangerd | Vimchek | Yaschamn |             |
|--------------|---------|-------|-------------|--------|----------|----------|------------|---------|----------|-------------|
| -            | 0.253   | 0.374 | 0.513       | 0.735  | 0.340    | 0.607    | 0.439      | 0.467   | 0.699    | Amirkelaieh |
| <b>0.301</b> | -       | 0.799 | 0.675       | 0.775  | 0.621    | 0.829    | 0.779      | 0.875   | 0.925    | Azbaran     |
| <b>0.156</b> | 0.422   | -     | 0.461       | 0.450  | 0.474    | 0.084    | 0.012      | 0.216   | 0.440    | Izeh        |
| <b>0.250</b> | 0.419   | 0.201 | -           | 0.657  | 0.538    | 0.679    | 0.622      | 0.679   | 0.864    | Kaniborazan |
| <b>0.299</b> | 0.485   | 0.233 | 0.307       | -      | 0.636    | 0.336    | 0.566      | 0.347   | 0.478    | Komjan      |
| <b>0.240</b> | 0.401   | 0.235 | 0.287       | 0.298  | -        | 0.629    | 0.476      | 0.645   | 0.779    | Miandoab    |
| <b>0.197</b> | 0.385   | -     | 0.263       | 0.206  | 0.241    | -        | 0.004      | 0.461   | 0.536    | Shushtar    |
| <b>0.196</b> | 0.456   | -     | 0.293       | 0.303  | 0.266    | 0.008    | -          | 0.356   | 0.511    | Soosangerd  |
| <b>0.258</b> | 0.516   | 0.135 | 0.348       | 0.248  | 0.339    | 0.208    | 0.238      | -       | 0.103    | Vimchek     |
| <b>0.404</b> | 0.595   | 0.312 | 0.447       | 0.415  | 0.461    | 0.340    | 0.398      | 0.207   | -        | Yaschaman   |

doi:10.1371/journal.pone.0161889.t004

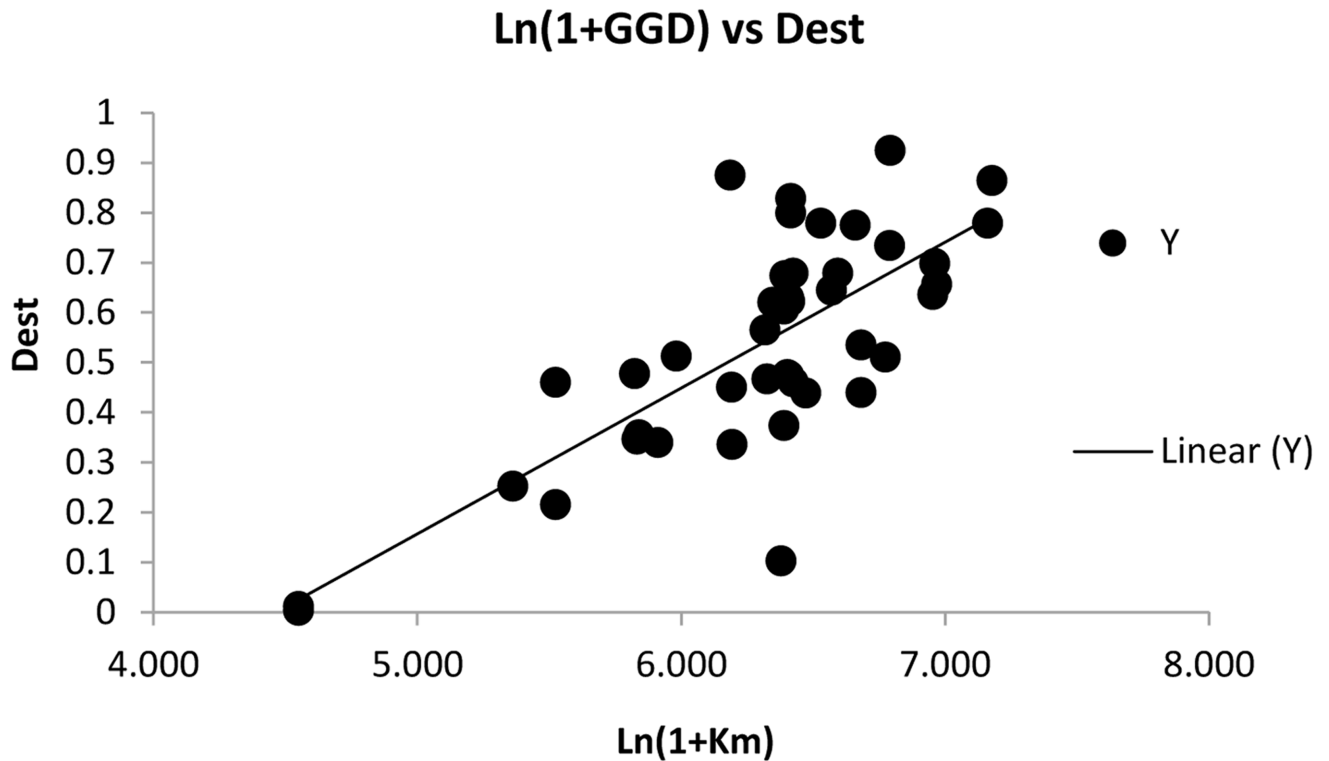

Fig 5. Relationship between  $D_{est}$  and geographic distance  $\ln(1+km)$  at population level.

doi:10.1371/journal.pone.0161889.g005

Stoeltin *et al* [66], Jackrel and Wootton [67] used low sample size in assessment variation of riparian plants within and among species shapes river communities.

Under an Island Migration Model, increasing geographical distance among populations is expected to lead to enhanced genetic isolation, which essentially corresponds to a stepping-stone population structure and requires that dispersal is primarily local rather than long-distance [2, 3,4,5,6]. Maximum geographic distance can have a strong effect on among population diversity [68]. With regard to genetic differentiation, observed  $F_{ST}$  value in this study was 0.5

Table 5. AMOVA result for 6 mountainous regions.

| Source              | df    | SS              | MS     | Est. Var. | %    |
|---------------------|-------|-----------------|--------|-----------|------|
| Among Regions       | 5     | 126.974         | 25.395 | 0.609     | 15%  |
| Among Pops          | 4     | 50.167          | 12.542 | 0.725     | 18%  |
| Among Indiv         | 58    | 152.654         | 2.632  | 0.000     | 0%   |
| Within Indiv        | 68    | 179.000         | 2.632  | 2.632     | 66%  |
| Total               | 135   | 508.794         |        | 3.966     | 100% |
| F-Statistics        | Value | P(rand >= data) |        |           |      |
| F <sub>rt</sub>     | 0.153 | 0.001           |        |           |      |
| F <sub>sr</sub>     | 0.216 | 0.001           |        |           |      |
| F <sub>st</sub>     | 0.336 | 0.001           |        |           |      |
| F <sub>is</sub>     | 0.000 | 0.493           |        |           |      |
| F <sub>it</sub>     | 0.336 | 0.001           |        |           |      |
| F <sub>rt max</sub> | 0.259 |                 |        |           |      |
| F' <sub>rt</sub>    | 0.593 |                 |        |           |      |

doi:10.1371/journal.pone.0161889.t005

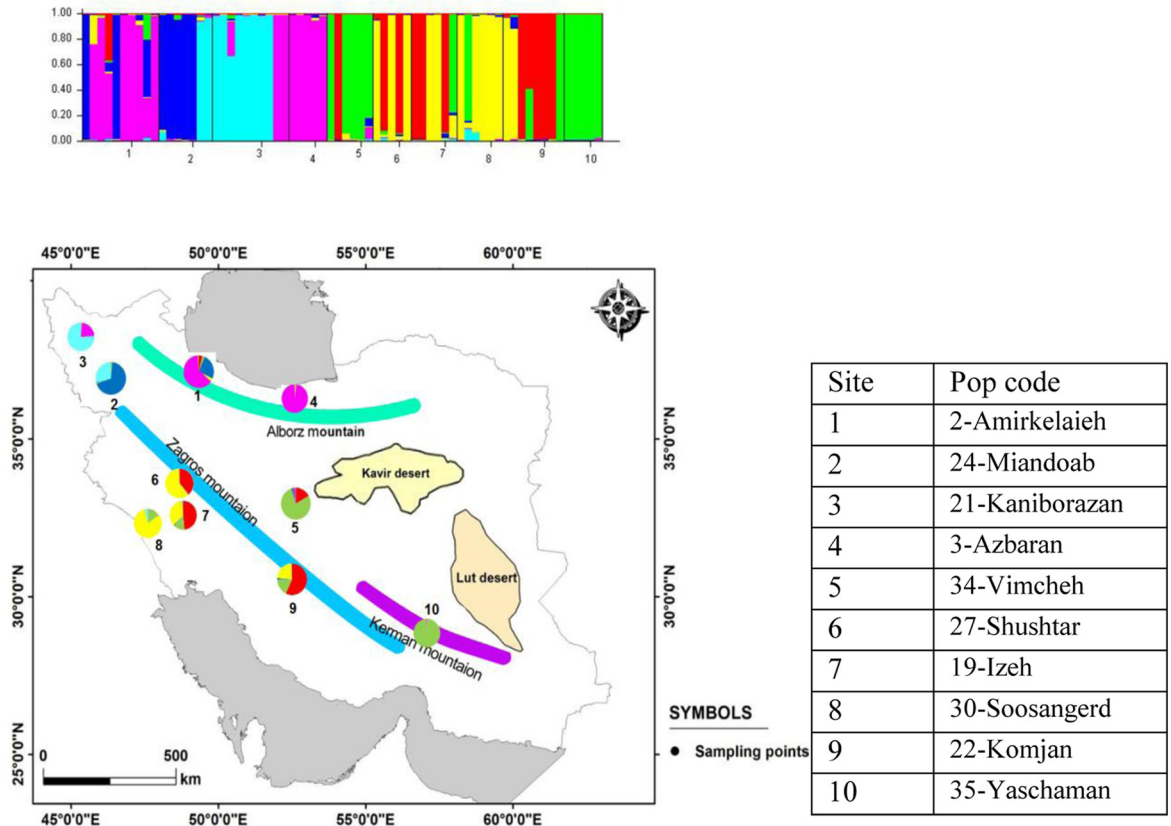

**Fig 6. Distribution map of genetic structure of 10 populations of *Potamogeton pectinatus* in Iran.**

doi:10.1371/journal.pone.0161889.g006

that was relatively high due to spatial differences of studied populations and stochastic founder events as in Triest *et al* [39] and Nies & Reusch [36]. However, the allelic differentiation ( $D_{est}$ ) was much more pronounced because of the large amount of alleles detected across the different areas. Also the  $H_e$  value in our study is higher than in central or western Europe [36, 39]. Genotypic variation and recombination in *P. pectinatus* due to sexual reproduction is most likely explaining the observed high genetic diversity [22, 23]. The mixed mode of reproduction in *P. pectinatus* has an important effect on its genetic structure [20] and we also observed some clonal repeats among ramets within a site. *P. pectinatus* is a polymorphic species with high phenotypic plasticity [28]. As a phenotypic plasticity phenomenon, the plants may produce more seeds that can lead to high genetic diversity and heterozygosity [69,70].

**Table 6. Spatial genetic structure analysis for 5 distance classes (using 10 populations).**

| Dist classes  | 1       | 2       | 3      | 4        | 5        |
|---------------|---------|---------|--------|----------|----------|
| Max distance  | 340     | 570     | 610    | 796      | 1308     |
| Mean distance | 178     | 472     | 600    | 687      | 1022     |
| $F_{ST}$      | 0.2174* | 0.3254  | 0.3154 | 0.3629   | 0.4958** |
| $R_{ST}$      | 0.3202* | 0.3293* | 0.4955 | 0.5818** | 0.6975** |

\* are significant values lower than average;

\*\* are significant values higher than average.

doi:10.1371/journal.pone.0161889.t006

## Geographic differentiation/IBD?/Connectivity

With regard to our results, we found strong genetic differentiation between Iranian sites of *Potamogeton pectinatus*. Mountains act as strong genetic barriers but river valleys recognized as corridors for gene flow [10]. The distribution of Iranian *Potamogeton* seems to be linked to mountain regions as indicated by the STRUCTURE results (for 10 populations) (Fig 6) and by the PCoA at individual level (for all 36 sites) (Fig 3). We obtained clear groups according to their 'Mountain positions': NE Alborz (3); NW Alborz (2); alongside of Urmieh lake (21, 24); SW Zagros (19, 27, 30), SE Zagros (22), N Zagros (34) and Kerman (35). Also allelic differentiation ( $D_{est}$  values) showed very low or absent connectivity across mountains north (Albroz) and south (Zagros/Kerman).

A strong correlation between genetic and geographic distances revealed a pattern of IBD across the distribution range of *P. pectinatus* in Iran. We found a strong positive correlation between  $D_{est}$  and geographic distances (Fig 5). The differentiation was larger for populations separated by the Alborz mountains than those separated by the Zagros mountains.

In spite of short (direct flight) distances between some populations, a high level of differentiation occurred because of dispersal barriers such as Alborz mountain (Amirkelaieh (2), Azbaran(3)) or (Kaniborazan (21); Miandoab (24)). The highest differentiation was between Azbaran and Yaschaman ( $F_{ST} = 0.595$ ;  $D_{est} = 0.925$ ) (Table 4). The combination of Alborz mountain, Kerman mountains and Kavir desert most likely explain this value.

There is however some connectivity between both sides of Zagros mountains namely between SW Zagros (19, 25, 27, 30) and N Zagros (4, 5, 6, 7, 8, 9, 18 etc.). This area in Iran was reported as a route for bird migration [71]. It thus can be assumed that e.g. between Izeh and Isfahan this route forms a ridge between high Zagros and low Zagros. Equally important could be the wider pass with upstream rivers reaching geographically rather close towards the watershed. A connectivity over longer distance exists between Vimcheh in Isfahan (N. Zagros) and Yaschaman (Kerman) with the corridor on the same side of the mountain area as a probable explanation (= ITS-B and cpDNA-380), together with the bird migration maintaining this connectivity. The connectivity along the same side of Zagros Mts is higher than for all other pairwise comparisons. The populations South of Zagros Mts, showed low differentiation between SW Zagros and SE Zagros and this was confirmed by the STRUCTURE results. Recent studies also indicate a plant species migration along altitudinal gradients [11]. A study of the population genetic diversity of *Rhodiola dumulosa* (Crassulaceae) between rivers in Mountains ridges also showed strong differentiation [5]. From that PCoA of individuals, there is a clear geographical gradient along the first axis and corresponding to their position alongside or across mountains.

## Microsatellites with dispersal evidence from maternal cpDNA of trnH-psbA

The most common haplotype (cp 378) can be observed in most regions but cp 379 in only two regions (NW Alborz; up of Lake Urmieh and N.Zagros) despite their large allelic differentiation of microsats. Thus the mutation of the chloroplast mononucleotide repeat (1 base only) is most likely independent as event in both regions and not an indication of long distance dispersal. Another shorter variant (cp377) also occurs in only two regions (NE of Alborz and N.Zagros) but remain very different for their microsats. So again, it most likely is an independent mutation event in both regions and not necessarily an indication of long distance dispersal. However, the haplotype variant cp380 and combined with a unique nuclear ITS-B variant could be an indication of historical dispersal over longer distances. These slow evolving genes are similar but the faster evolving microsats show large differences between pop 1, 5 and 15/35. Therefore,

we assume that the isolation of 15/35 is not a recent one. *Potamogeton* represents the largest genus in Potamogetonaceae, including about 100 species and 50 interspecific hybrids worldwide. Hybridization therefore can be another complexity that is thought to be relatively frequent, because complex series of polyploidy and aneuploidy are present within the genus [28]. The hexaploid *P. pectinatus* having 78 chromosomes could form hybrids with other linear leafed taxa such as *P. filiformis* and *P. amblyphyllus* [72]. This issue might have an effect on the genetic diversity of *Potamogeton* populations. In our study we have detected only *P. pectinatus* haplotypes in correlation with specific microsatellite alleles for each site. No chloroplast capture was found. Consequently, we assume the absence of hybrid specimen in our samples.

## Habitat

It is proven that habitat diversity often makes ecological barriers against gene flow that leads to interpopulation genetic separation [73,74]. Different populations produce different selection pressures in the presence of environmental conditions [75,73]. Iran has different ecological conditions that lead to different plant vegetations and biogeographic regions. In recent years, changing environmental conditions such as global warming, drought or in some cases grazing by fishes could be interesting for knowing how genetic diversity is retained in such situations [74]. Iran lies in a region that confronts droughts. This phenomenon could have led to the bottleneck effect in Vimchah and Izeh because of temporary habitats at low level of river water. In Azbaran, there is a high level of fish grazing pressure and also probably water bird feed on seeds and tubers that might have led to repeated bottlenecks (Table 3). The highest allelic and heterozygosity level was observed in N.Alborz and Kaniborazan population in West of Alborz-Azarbayegan Province. These provinces is documented to harbor the largest ecological diversity of Iran. Assignment of individuals to the own Kaniborazan population was highest because this population had the highest number of private alleles. In aquatic ecosystems, flow regimes and seasonal changing of water level lead to spread the seed to different habitats, inducing genetic diversity of aquatic populations [40]. Our results showed few shared alleles giving a stronger population genetic structure. The flora of the mountains provides many examples of closely related species or subspecies with populations that show limited gene flow due to these inherent geographic barriers [7,8]. In this study the individuals corresponding to populations of Aligoodarz, Borujen, Yaschaman and Googhar were separated from other *P. pectinatus* populations with 100% bootstrap. Additional evidence from ITS and cpDNA was provided and indicated these as an evolutionary significant unit (ESU). The morphological characters such as leaf sheath, width of leaf and tip of leaf were different from all other populations. These populations clearly belong to an evolutionary lineage within *P. pectinatus* and do not represent another species (e.g. *P. amblyphyllus*) because their ITS in a NJtree was separated (97% bootstrap) from *P. amblyphyllus* (*S. amblyophylla*) of NCBI (next paper under submission).

As a conclusion, when considering *P. pectinatus* populations over a long gradient of regions across mountain ranges and around deserts in Iran, their genetic differentiation over distances was more pronounced and structured than for temperate regions. However, across such habitats *P. pectinatus* maintained an even higher level of allele and gene diversity than in temperate regions.

## Acknowledgments

We wish to thank Department of Biology, University of Isfahan for supporting this work and VUB (Vrije Universiteit Brussel) in Belgium, research group APNA laboratory for supports in experimental work on microsatellites (BAS42). The first author was supported by a scholarship from Iran's Ministry of Science.



## Author Contributions

**Conceptualization:** S. Afsharzadeh LT.

**Data curation:** LT.

**Formal analysis:** LT.

**Funding acquisition:** S. Afsharzadeh.

**Investigation:** S. Abbasi.

**Methodology:** S. Afsharzadeh HS LT.

**Project administration:** S. Afsharzadeh LT.

**Resources:** S. Afsharzadeh LT.

**Supervision:** S. Afsharzadeh LT.

**Validation:** S. Afsharzadeh LT.

**Visualization:** S. Abbasi.

**Writing – original draft:** S. Abbasi.

**Writing – review & editing:** S. Abbasi S. Afsharzadeh LT.

## References

1. Moyle PB, Cech J. J. Jr. Fishes: An Introduction to Ichthyology. 5th ed. Prentice-Hall: Upper Saddle River, NJ. USA; 2004.
2. Hollingsworth PM, Preston CD, Gornall RJ. Genetic variability in two hydrophilous species of *Potamogeton*, *P. pectinatus* and *P. filiformis* (Potamogetonaceae). *Plant Syst Evol.* 1996; 202: 233–254.
3. Werth S, Scheidegger C. Gene Flow within and between Catchments in the Threatened Riparian Plant *Myricaria germanica*. *PLoS ONE.* 2014; 9(6): 1–13.
4. Pollux BJA, Luteijn A, Van Groenendael JM, Ouborg NJ. Gene flow and genetic structure of the aquatic macrophyte *Sparganium emersum* in a linear unidirectional river. *Freshwater Biol.* 2009; 54: 64–76.
5. Hou Y, Lou Y. Population Genetic Diversity and Structure of a Naturally Isolated Plant Species, *Rhodiola dumulosa* (Crassulaceae). *PLoS ONE.* 2011; 6(9): 1–10.
6. Wu Z, Yu D, Li X, Xu X. Influence of geography and environment on patterns of genetic differentiation in a widespread submerged macrophyte, Eurasian watermilfoil (*Myriophyllum spicatum* L., Haloragaceae). *Ecol. Evol.* 2016; 6(2): 460–468. doi: [10.1002/ece3.1882](https://doi.org/10.1002/ece3.1882) PMID: [26843930](https://pubmed.ncbi.nlm.nih.gov/26843930/)
7. Thompson JD. Population differentiation in Mediterranean plants: insights into colonisation history and implications for species diversification. *Heredity.* 1999; 82: 229–236.
8. Kropf M, Comes HP, Kadereit JW. Long-distance vs vicariance. The origin and genetic diversity of alpine plants in the Spanish Sierra Nevada. *New Phytol.* 2006; 172: 169–184. PMID: [16945099](https://pubmed.ncbi.nlm.nih.gov/16945099/)
9. Thiel-Egenter C, Gugerli F, Alvarez N, Brodbeck S, Cieslak E, Colli L, et al. Effects of species traits on the genetic diversity of high-mountain plants: a multi-species study across the Alps and the Carpathians. *Global Ecol. Biogeogr.* 2009; 18: 78–87.
10. Wei X, Meng H, Jiang M. Landscape Genetic Structure of a Streamside Tree Species *Euptelea pleiospermum* (Eupteleaceae): Contrasting Roles of River Valley and Mountain Ridge. *PLoS ONE.* 2013; 8(6): 1–8.
11. Hahn TC, Kettle J, Ghazoul J, Frei ER, Matter P, Pluess AR. Patterns of Genetic Variation across Altitude in Three Plant Species of Semi-Dry Grasslands. *PLoS ONE.* 2012; 7(8): 1–10.
12. Gilbert S, Lackstrom K, Tufford D. The Impact of Drought on Coastal Wetlands in the Carolinas. State of Knowledge Report; 2012.
13. Wang IJ, Summers K. Genetic structure is correlated with phenotypic divergence rather than geographic isolation in the highly polymorphic strawberry poison-dart frog. *Mol. Ecol.* 2010; 19: 447–458. doi: [10.1111/j.1365-294X.2009.04465.x](https://doi.org/10.1111/j.1365-294X.2009.04465.x) PMID: [20025652](https://pubmed.ncbi.nlm.nih.gov/20025652/)

14. Wang IJ, Bradburd GS. Isolation by environment. *Mol. Ecol.* 2014; 23:5649–5662. doi: [10.1111/mec.12938](https://doi.org/10.1111/mec.12938) PMID: [25256562](https://pubmed.ncbi.nlm.nih.gov/25256562/)
15. Zacharias I, Dimitriou E, Dekker A, Dorsman E. Overview of temporary ponds in the Mediterranean region: Threats, management and conservation issues. *J. Env. Biol.* 2007; 28(1): 1–9.
16. Miyan MA. Droughts in Asian Least Developed Countries: Vulnerability and sustainability. *Weather and Climate Extremes.* 2015; 7:8–23.
17. Williams P, Whitfield M, Biggs J. Comparative biodiversity of rivers, streams, ditches and ponds in an agricultural landscape in southern England. *Conserv. Biol.* 2003; 115: 329–341.
18. Angelibert S, Marty P, Cereghino R, Giani N. Seasonal variations in the physical and chemical characteristics of ponds: implications for biodiversity conservation. *Aquat Conserv.* 2004; 14: 439–456.
19. Biggs J, Williams P, Whitfield M, Nicolet P, Weatherby A. 15 Years of pond assessment in Britain: results and lessons learned from the work of pond conservation. *Aquat Conserv.* 2005; 15: 693–714.
20. Barrett SCH, Eckert CG, Husband BC. Evolutionary processes in aquatic plant populations. *Aquat. Bot.* 1993; 44: 105–145.
21. Barrat-Segretain MH. Strategies of reproduction, dispersion and competition in river plants: a review. *Vegetation.* 1996; 123: 13–37.
22. Mader E, van Viersen W, Schwenk K. Clonal diversity in the submerged macrophyte *Potamogeton pectinatus* L. inferred from nuclear and cytoplasmic variation. *Aquat. Bot.* 1998; 62: 147–160.
23. Hangelbroek HH, Santamaria L, de Boer T. Local adaptation of the pondweed *Potamogeton pectinatus* to contrasting substrate types mediated by changes in propagule provisioning. *J. Ecol.* 2003; 91: 1081–1092.
24. Yakimowski SB, Barrett SCH. Clonal genetic structure and diversity in populations of an aquatic plant with combined vs. separate sexes. *Mol. Ecol.* 2014; 23: 2914–2928 doi: [10.1111/mec.12791](https://doi.org/10.1111/mec.12791) PMID: [24815077](https://pubmed.ncbi.nlm.nih.gov/24815077/)
25. Lyu N, Wang XF. A comparative study of clonal structure in two *Sagittaria* species with the same clonal growth modes: *Sagittaria trifolia* and *S. pygmaea*. *Aquat. Bot.* 2016; 128:41–47.
26. Hamrick JL, Godt MJW. Allozyme diversity in plant species. In Brown AHD, Clegg MT, Kahler AL, Weir BS (eds), *Plant Population Genetics Breeding and Genetic Resources*. Sinauer, Sunderland, MA. 1989; 43–63.
27. Sandsten H, Beklioglu M, Ince O. Effect of waterfowl, large fish and periphyton on the spring growth of *Potamogeton pectinatus* L. in lake Mogan Turkey. *Hydrobiologia.* 2005; 537:239–5478.
28. Wiegleb G, Kaplan Z. An account of the species of *Potamogeton* L. (*Potamogetonaceae*). *Folia Geobot.* 1998; 33: 241–316.
29. Van Wijk RJ. Ecological studies on *Potamogeton pectinatus* L. III. Reproductive strategies and germination ecology. *Aquat. Bot.* 1989; 33: 291–299.
30. Lone PA, Bhardwaj AK, Bahar FA. A study of comparative purification efficiency of two species of *Potamogeton* (submerged macrophyte) in wastewater treatment. *IJSR.* 2013; 1–5.
31. Demirezen D, Aksoy A. Accumulation of heavy metals in *Typha angustifolia* and *Potamogeton pectinatus* living in Sultan Marsh (Kayseri, Turkey). *Chemosphere.* 2004; 56: 685–696. PMID: [15234165](https://pubmed.ncbi.nlm.nih.gov/15234165/)
32. Ren D, Peng G, Huang H, Wang H, Zhang Sh. Effect of rhodoxanthin from *Potamogeton crispus* L. on cell apoptosis in Hela cells. *Toxicol. In Vitro.* 2006; 20: 1411–1418. PMID: [16919415](https://pubmed.ncbi.nlm.nih.gov/16919415/)
33. Hettiarachchi P, Triest L. Isozyme polymorphism in the genus *Potamogeton* (*Potamogetonaceae*). *Opera Botanica Belgica.* 1991; 4: 87–114.
34. King RA, Gormall RJ, Preston CD, Croft JM. Population differentiation of *Potamogeton pectinatus* in the Baltic Sea with reference to waterfowl dispersal. *Mol.Ecol.* 2002; 11: 1947–1956. PMID: [12296939](https://pubmed.ncbi.nlm.nih.gov/12296939/)
35. Klaassen M, Nolet BA. The role of herbivorous water birds in aquatic systems through interactions with aquatic macrophytes, with special reference to the Bewick's Swan—Fennel Pondweed system. *Hydrobiologia.* 2007; 584:205–213.
36. Nies G, Reusch TBH. Nine polymorphic microsatellite loci for the fennel pondweed *Potamogeton pectinatus* L. *Mol. Ecol. Res.* 2004; 4: 563–565.
37. Nies G, Reusch TBH. Evolutionary divergence and possible incipient speciation in post-glacial populations of a cosmopolitan aquatic plant. *J. Evol. Biol.* 2005; 18: 19–26. PMID: [15669957](https://pubmed.ncbi.nlm.nih.gov/15669957/)
38. Triest L, Thi VT, Dinh LT, Sierens T, VanGeert A. Genetic differentiation of submerged plant populations and taxa between habitats. *Hydrobiologia.* 2010; 656:15–27.
39. Triest L, Fenart S. Clonal diversity and spatial genetic structure of *Potamogeton pectinatus* in managed pond and river populations. *Hydrobiologia.* 2014; 737:145–161.

40. Han Q, Wang G, Li W, Liu F. Genetic diversity of *Potamogeton pectinatus* L. in relation to species diversity in a pair of lakes of contrasting trophic levels. *Biochem. Syst. Ecol.* 2014; 57:60–66.
41. Firouz E. *Wildlife of Iran, Vertebrates*. Iran University Press, Tehran; 2000.
42. Rahel FJ. Biogeographic barriers, connectivity and homogenization of freshwater faunas: it's a small world after all. *Freshwater Biology.* 2007; 52, 696–710
43. Cox CB, Moore PD. *Biogeography: An Ecological and Evolutionary Approach*. Halsted Press, NY, U.S.A; 1980.
44. Ricklefs RE, Schluter D. Species diversity: regional and historical influences. In: *Species Diversity in Ecological Communities: Historical and Geographical Perspectives* (Eds Ricklefs R.E. & Schluter D.). 1993; pp. 350–363. The University of Chicago Press, Chicago, IL, U.S.A.
45. Ramsar. The List of Wetlands of International Importance. Available: <http://www.ramsar.wetlands.org>; 2014
46. Daryadel E, Talaei F. Analytical Study on Threats to Wetland Ecosystems and their Solutions in the Framework of the Ramsar Convention. *World Acad Sci Eng Technol.* 2014; 2091–2101.
47. Lindqvist C, De-Laet J, Haynes RR, Aagesen L, Keener BR, Albert VA. Molecular phylogenetics of an aquatic plant lineage, Potamogetonaceae. *Cladistics.* 2006; 22: 568–588.
48. Kautsky L. Seed and tuber banks of the aquatic macrophytes in the Askö area, northern Baltic proper. *Holarctic Ecol.* 1990; 13: 143–148.
49. Triest L, Sierens T. Seagrass Radiation after Messinian Salinity Crisis Reflected by Strong Genetic Structuring and Out-of-Africa Scenario (Ruppiales). *PLoS ONE.* 2014; 9(8):1–14.
50. Gawel NJ, Jarret RL. A modified CTAB extraction procedure for *Musa* and *Ipomoea*. *Plant Mol Biol Rep.* 1991; 9(3): 262–266.
51. Goudet J. FSTAT (Version 1.2). A computer program to calculate F-statistics. *J. Hered.* 1995; 86: 485–486.
52. Peakall R, Smouse PE. GenAlEx 6.5: genetic analysis in Excel. Population genetic software for teaching and research—an update. *Bioinformatics.* 2012; 28: 2537–2539. PMID: [22820204](https://pubmed.ncbi.nlm.nih.gov/22820204/).
53. Wright S. Isolation by distance. *Genetics.* 1943; 28: 114–138. PMID: [17247074](https://pubmed.ncbi.nlm.nih.gov/17247074/)
54. Weir BS, Cockerham CC. Estimating F-statistics for the analysis of population structure. *Evolution.* 1984; 38:1358–1370.
55. Rousset F. Genetic differentiation and estimation of gene flow from F-statistics under isolation by distance. *Genetics.* 1997; 145: 1219–1228. PMID: [9093870](https://pubmed.ncbi.nlm.nih.gov/9093870/)
56. Piry S, Alapetite A, Cornuet JM. GeneClass2: A software for genetic assignment and first-generation migrant detection. *J. Hered.* 2004; 95: 536–539. PMID: [15475402](https://pubmed.ncbi.nlm.nih.gov/15475402/)
57. Michalakis Y, Excoffier L. A generic estimation of population subdivision using distances between alleles with special reference for microsatellite loci. *Genetics.* 1996; 142: 1061–1064. PMID: [8849912](https://pubmed.ncbi.nlm.nih.gov/8849912/)
58. Mantel N. Detection of disease clustering and a generalized regression approach. *Cancer Research.* 1967; 27: 209–220. PMID: [6018555](https://pubmed.ncbi.nlm.nih.gov/6018555/)
59. Jost L. GST and its relatives do not measure differentiation. *Molecular Ecology.* 2008; 17(18): 4015–4026. PMID: [19238703](https://pubmed.ncbi.nlm.nih.gov/19238703/).
60. Crawford NG. SMOGD: software for the measurement of genetic diversity. *Molecular Ecology Resources.* 2010; 10: 556–557. doi: [10.1111/j.1755-0998.2009.02801.x](https://doi.org/10.1111/j.1755-0998.2009.02801.x) PMID: [21565057](https://pubmed.ncbi.nlm.nih.gov/21565057/).
61. Pritchard JK, Stephens M, Donnelly P. Inference of population structure using multilocus genotype data. *Genetics.* 2000; 155: 945–959. PMID: [10835412](https://pubmed.ncbi.nlm.nih.gov/10835412/)
62. Evanno G, Regnaut S, Goudet J. Detecting the number of clusters of individuals using the software STRUCTURE: a simulation study. *Mol Ecol.* 2005; 14(8): 2611–20. PMID: [15969739](https://pubmed.ncbi.nlm.nih.gov/15969739/).
63. Takezaki N, Nei M, Tamura K. POPTREE2: Software for constructing population trees from allele frequency data and computing other population statistics with Windows-interface. *Molecular Biology and Evolution.* 2010; 27:747–752.
64. Hardy OJ, Vekemans X. SPAGED1: a versatile computer program to analyse spatial genetic structure at the individual or population levels. *Mol. Ecol. Res.* 2002; 2: 618–620.
65. Rodriguez-Bonilla L, Cuevas HE, Montero-Rojas M, Bird-Pico F, Luciano-Rosario D, Sirtunga D. Assessment of Genetic Diversity of Sweet Potato in Puerto Rico. *PLoS ONE.* 2014; 9(12): 1–14.
66. Stoelting RE, Measey GJ, Drewes RC. Population Genetics of the São Tomé Caecilian (Gymnophiona: Dermophiidae: *Schistometopum thomense*) Reveals Strong Geographic Structuring. *PLoS ONE.* 2014; 9(8): 1–13.

67. Jackrel SL, Wootton JT. Diversity of Riparian Plants among and within Species Shapes River Communities. PLoS ONE. 2015; 10(11): 1–19.
68. Nybom H. Comparison of different nuclear DNA markers for estimating intraspecific genetic diversity in plants. Mol Ecol. 2004; 13:1143–55. PMID: [15078452](#)
69. Gratani L. Plant Phenotypic Plasticity in Response to Environmental Factors. Advances in Botany. 2014; 1–17.
70. Fordyce J. Review the evolutionary consequences of ecological interactions mediated through phenotypic plasticity. J. Exp. Biol. 2006; 209: 2377–2383.
71. Sehhatisabet ME, Khaleghizadeh A. A review of current knowledge of radio-tracking of waterbirds and raptors in Iran. Podocees. 2013; 8(2): 22–30.
72. Kaplan Z. Hybridization of *Potamogeton* species in the Czech Republic: diversity, distribution, temporal trends and habitat preferences. Preslia. 2010; 82: 261–287.
73. Odat N, Jetschke G, Hellwig FH. Genetic diversity of *Ranunculus acris* L. (Ranunculaceae) populations in relation to species diversity and habitat type in grassland communities. Mol. Ecol. 2004; 13: 1251–1257. PMID: [15078460](#)
74. Hoffmann AA, Sgr CM. Climate change and evolutionary adaptation. Nature. 2011; 470: 479–485. doi: [10.1038/nature09670](#) PMID: [21350480](#)
75. Linhart YB, Grant MC. Evolutionary significance of local genetic differentiation in plants. Annu. Rev. Ecol. Syst. 1996; 27: 237–277.
